# Supplementary material for: Association of kyphotic posture with loss of independence and mortality in a community-based prospective cohort study: the Locomotive Syndrome and Health Outcomes in Aizu Cohort Study (LOHAS)
Source: PubMed Central journal article supplement — BMJ Open. 2022 Mar 31;12(3):e052421. doi: 10.1136/bmjopen-2021-052421 (PMC8971797; doi:10.1136/bmjopen-2021-052421), 2022-03-31
Supplement: bmjopen-2021-052421supp001.pdf [file bmjopen-2021-052421supp001.pdf]

**Supplementary Material 1****Supplemental material for: “Association of kyphotic posture with loss of independence and mortality in a community-based prospective cohort study: The Locomotive Syndrome and Health Outcomes in Aizu Cohort Study (LOHAS)”**

**Supplementary Table 1.** Sensitivity analysis with multiple imputation for mortality according to the degree of kyphosis

|                  | Number of participants | Frequency of mortality | Occurrence rate/year | Unadjusted HR (95% CI) | Adjusted HR (95% CI) <sup>a</sup> |
|------------------|------------------------|------------------------|----------------------|------------------------|-----------------------------------|
| Kyphotic posture |                        |                        |                      |                        |                                   |
| None             | 1525                   | 73                     | 0.009                | Ref.                   | Ref.                              |
| Mild             | 369                    | 30                     | 0.015                | 1.72 (1.13–2.64)       | 1.19 (0.77–1.84)                  |
| Severe           | 299                    | 38                     | 0.023                | 2.76 (1.86–4.08)       | 1.80 (1.17–2.77)                  |

Abbreviations: HR = hazard ratio; CI = confidence interval.

<sup>a</sup>Estimated from a Cox regression model adjusted for age, sex, body mass index, smoking habit, lumbar spinal stenosis, low back pain, good health status, history of stroke, and handgrip strength.
