# Supplementary material for: Association of kyphotic posture with loss of independence and mortality in a community-based prospective cohort study: the Locomotive Syndrome and Health Outcomes in Aizu Cohort Study (LOHAS)
Source: PubMed Central journal article supplement — BMJ Open. 2022 Mar 31;12(3):e052421. doi: 10.1136/bmjopen-2021-052421 (PMC8971797; doi:10.1136/bmjopen-2021-052421), 2022-03-31
Supplement: bmjopen-2021-052421supp002.pdf [file bmjopen-2021-052421supp002.pdf]

**Supplementary Material 2****Supplemental material for: “Association of kyphotic posture with loss of independence and mortality in a community-based prospective cohort study: The Locomotive Syndrome and Health Outcomes in Aizu Cohort Study (LOHAS)”****Supplementary Table 2.** Sensitivity analysis with multiple imputation for loss of independence according to the degree of kyphosis

|                         | Number of participants | Frequency of loss of independence | Occurrence rate/year | Unadjusted HR (95% CI) | Adjusted HR (95% CI) <sup>a</sup> |
|-------------------------|------------------------|-----------------------------------|----------------------|------------------------|-----------------------------------|
| <b>Kyphotic posture</b> |                        |                                   |                      |                        |                                   |
| None                    | 1525                   | 114                               | 0.015                | Ref.                   | Ref.                              |
| Mild                    | 369                    | 47                                | 0.018                | 2.10 (1.49–2.97)       | 1.47 (1.03–2.10)                  |
| Severe                  | 299                    | 73                                | 0.045                | 3.33 (2.46–4.49)       | 1.74 (1.25–2.43)                  |

Abbreviations: HR = hazard ratio; CI = confidence interval.

<sup>a</sup> Estimated from a Cox regression model adjusted for age, sex, body mass index, smoking habit, lumbar spinal stenosis, low back pain, good health status, stroke history, and handgrip strength.
