# Supplementary material for: Association of kyphotic posture with loss of independence and mortality in a community-based prospective cohort study: the Locomotive Syndrome and Health Outcomes in Aizu Cohort Study (LOHAS)
Source: PubMed Central journal article supplement — BMJ Open. 2022 Mar 31;12(3):e052421. doi: 10.1136/bmjopen-2021-052421 (PMC8971797; doi:10.1136/bmjopen-2021-052421), 2022-03-31
Supplement: bmjopen-2021-052421supp003.pdf [file bmjopen-2021-052421supp003.pdf]

**Supplementary Material 3****Supplemental material for: “Association of kyphotic posture with loss of independence and mortality in a community-based prospective cohort study: The Locomotive Syndrome and Health Outcomes in Aizu Cohort Study (LOHAS)”****Supplementary Table 3.** Sensitivity analysis with multiple imputation for loss of independence and mortality according to the degree of kyphosis

|                         | Number of Participants | Frequency of loss of independence and mortality | Occurrence rate/year | Unadjusted HR (95% CI) | Adjusted HR (95% CI) <sup>a</sup> |
|-------------------------|------------------------|-------------------------------------------------|----------------------|------------------------|-----------------------------------|
| <b>Kyphotic posture</b> |                        |                                                 |                      |                        |                                   |
| None                    | 1525                   | 176                                             | 0.021                | Ref.                   | Ref.                              |
| Mild                    | 369                    | 65                                              | 0.033                | 1.78 (1.33–2.37)       | 1.26 (0.93–1.69)                  |
| Severe                  | 299                    | 93                                              | 0.06                 | 2.78 (2.16–3.59)       | 1.63 (1.23–2.16)                  |

Abbreviations: HR = hazard ratio; CI = confidence interval.

<sup>a</sup>Estimated from a Cox regression model adjusted for age, sex, body mass index, smoking habit, lumbar spinal stenosis, low back pain, good health status, stroke history, and handgrip strength.

<sup>b</sup>Composite outcome of loss of independence and mortality.
